# Supplementary material for: Na-decorated binary spinel ferrite catalysts for the hydrogenation of CO2 to olefins
Source: Royal Society of Chemistry journal article supplement (doi:10.1039/d5cy00033e), 2025-01-01
Supplement: d5cy00033e1.pdf [file d5cy00033e1.pdf]

# **Na-decorated binary spinel ferrite catalysts for the hydrogenation of CO<sub>2</sub> to olefins**

Hanjun Lu,<sup>1</sup> Xia Li,<sup>1</sup> Guangchao Li,<sup>2,\*</sup> Xinlin Hong<sup>1,\*</sup> Shik Chi Edman Tsang<sup>2</sup>

## Methods

**Synthesis of MFe<sub>2</sub>O<sub>4</sub>.** The different transition metals spinel ferrite was prepared by an organic combustion method with the M/Fe atomic ratio of 1:2 (at/at) (M = Zn, Cu, Co). Typically, 16.16 g of Fe(NO<sub>3</sub>)<sub>3</sub>·9H<sub>2</sub>O, 5.95 g of Zn(NO<sub>3</sub>)<sub>2</sub>·6H<sub>2</sub>O and 23.06 g of citric acid monohydrate were dissolved in 23 mL of deionized water. The initial mixture was stirred to form a homogeneous aqueous solution and heated at 90 °C for 4 h. The obtained paste was then dried at 120 °C overnight.

**Synthesis of Fe<sub>2</sub>O<sub>3</sub>.** The Fe<sub>2</sub>O<sub>3</sub> was prepared following the similar procedure. Typically, the 24.24 g of Fe(NO<sub>3</sub>)<sub>3</sub>·9H<sub>2</sub>O and 23.06 g of citric acid monohydrate were dissolved in 23 mL of deionized water. The initial mixture was stirred to form a homogeneous aqueous solution and heated at 90 °C for 4 h. The obtained paste was then dried at 120 °C overnight.

**Synthesis of NaMFe.** The NaMFe catalyst was prepared by incipient wetness impregnation method. By controlling the impregnation content, the Na content in all catalysts is 2 wt%. Typically, the Fe<sub>3</sub>O<sub>4</sub> powder was placed into 2 mL of Na<sub>2</sub>CO<sub>3</sub> solution and kept for 2 h at room temperature under constant stirring, completely dried by rotary evaporation, and then calcined in the muffle oven at 400 °C for 4 h with a heating rate of 2 °C min<sup>-1</sup>. The obtained different catalysts were labeled as NaMFe catalyst, where M represents the transition metal elements.

**Synthesis of NaCoFe with different Fe/Co ratio.** The NaCoFe with different Fe/Co ratio was prepared following the similar procedure as NaCoFe.

**Catalytic testing.** The evaluation of the catalyst was conducted in a fixed-bed reactor with an inside diameter of 6 mm. Firstly, 0.2 g precursor catalysts were mixed with 0.4 g quartz sand (40-60 mesh) and pre-reduced in a H<sub>2</sub> stream (30 mL min<sup>-1</sup>) at 400 °C under atmospheric pressure for 2 h. After the temperature cooled down below 320 °C, a reactant (CO<sub>2</sub>/H<sub>2</sub>=1/3 by volume, 4 vol% N<sub>2</sub> as an internal standard, and GHSV of 3000 mL g<sub>cat</sub><sup>-1</sup> h<sup>-1</sup>) was inducted into the reactor. Then the pressure and temperature were adjusted to the desired value (typically 1 MPa and 320 °C, respectively) to initiate the reaction. The reaction conditions were as follows except for those special labeled: H<sub>2</sub>/CO<sub>2</sub> = 3; pressure, 1 MPa; temperature, 320 °C; and gas hourly space velocity (GHSV), 3000 mL g<sub>cat</sub><sup>-1</sup> h<sup>-1</sup>. The products were monitored online by a gas chromatograph equipped with a thermal conductivity detector (TCD, TDX-01 column) and flame ionization detector (FID, CB-Plot Q capillary column).

The CO<sub>2</sub> conversion, CO selectivity, C<sub>i</sub> products selectivity and CO-free products selectivity were calculated according to the following equations 1-4:

$$\text{CO}_2 \text{ Conversion} = \frac{\text{CO}_2 \text{ in} - \text{CO}_2 \text{ out}}{\text{CO}_2 \text{ in}} \times 100\% \quad (\text{Eq 1})$$

$$\text{CO Selectivity} = \frac{\text{CO}_2 \text{ out}}{\text{CO}_2 \text{ in} - \text{CO}_2 \text{ out}} \times 100\% \quad (\text{Eq 2})$$

$$\text{C}_i \text{ Selectivity} = \frac{\text{C}_{i \text{ out}} \times i}{\text{CO}_2 \text{ in} - \text{CO}_2 \text{ out}} \times 100\% \quad (\text{Eq 3})$$

$$\text{CO free } C_i \text{ Selectivity} = \frac{C_{i \text{ out}} \times i}{\sum_{i=1}^n C_{i \text{ out}} \times i} \times 100\% \quad (\text{Eq 4})$$

Where  $\text{CO}_{2 \text{ in}}$  and  $\text{CO}_{2 \text{ out}}$  stand for moles of  $\text{CO}_2$  at the inlet and outlet, respectively.  $\text{CO}_{\text{out}}$  refers to CO at the outlet.  $C_{i \text{ out}}$  and  $i$  denote the carbon moles and carbon number of the carbon products ( $C_i$ ) at the outlet. The catalytic results show that the carbon balance was close to within 5 %.

**H<sub>2</sub>-TPR measurements.** Temperature-programmed reduction of H<sub>2</sub> (H<sub>2</sub>-TPR) were measured by using a Micromeritics Autochem 2920. Typically, 30 mg of catalyst was placed into a U-type quartz tube and pre-treated in a high purity Ar gas (30 mL min<sup>-1</sup>) at 150 °C for 1 h. After cooled down to room temperature, the gas was switched into 5 vol% H<sub>2</sub>/Ar (30 mL min<sup>-1</sup>) and the tube was purged for 10 min. After that, the sample temperature was ramped up to 900 °C with a heating rate of 10 °C min<sup>-1</sup>, and a TCD (thermal conductivity detector) recording was simultaneously started.

**CO<sub>2</sub>-TPD measurements.** Temperature-programmed desorption with CO<sub>2</sub> (CO<sub>2</sub>-TPD) were done on Micromeritics AutoChem 2920 apparatus with an on-line Hiden QIC-20 mass spectrometer. Briefly, 30mg of catalyst was pretreated with 5 vol% H<sub>2</sub>/Ar at 400 °C for 2 h and cooled to 50 °C. Afterwards, the pretreated catalyst was exposed to pure CO<sub>2</sub> at 50 °C for 30 min and then purged with Ar flow at the same temperature to eliminate all physisorbed CO<sub>2</sub>. After 1 h purging, the temperature was raised from 50 to 800 °C (10 °C min<sup>-1</sup> ramp rate) as CO<sub>2</sub> desorption (m/z signal = 44) was monitored by mass spectrometer.

**H<sub>2</sub>-TPD measurements.** Temperature-programmed desorption with (C<sub>2</sub>H<sub>4</sub>-TPD) were also measured using the same Micromeritics Autochem 2920 instrument and H<sub>2</sub> desorption (m/z signal = 2) was monitored by mass spectrometer. The procedures are similar to those employed for CO<sub>2</sub>-TPD except that CO<sub>2</sub> was replaced with 5 vol% H<sub>2</sub>/Ar.

**C<sub>2</sub>H<sub>4</sub>-TPD measurements.** Temperature-programmed desorption with (C<sub>2</sub>H<sub>4</sub>-TPD) were also measured using the same Micromeritics Autochem 2920 instrument and C<sub>2</sub>H<sub>4</sub> desorption (m/z signal = 28) was monitored by mass spectrometer. The procedures are similar to those employed for CO<sub>2</sub>-TPD except that CO<sub>2</sub> was replaced with 5 vol% C<sub>2</sub>H<sub>4</sub>/N<sub>2</sub>.

**C<sub>2</sub>H<sub>4</sub>-PTH measurements.** Pulse transient hydrogenation with C<sub>2</sub>H<sub>4</sub> (C<sub>2</sub>H<sub>4</sub>-PTH) were performed as follows: 30mg of spent catalyst was pretreated with 5 vol% H<sub>2</sub>/Ar (30 mL min<sup>-1</sup>) at 320 °C for 1 h. Afterwards, the C<sub>2</sub>H<sub>4</sub> pulse was imported into the reactor for several cycles with an interval time of 10 min. The MS signals of C<sub>2</sub>H<sub>4</sub> (m/z = 28) and C<sub>2</sub>H<sub>6</sub> (m/z = 30) were collected.

**Material characterization.** XRD patterns were obtained on a Rigaku Miniflex600 (Japan) X-ray diffractometer with a Cu K $\alpha$  ( $\lambda = 0.15406$  nm) radiation source. Brunauer-Emmett-Teller (BET) surface area and pore structure were analyzed on a Micromeritics ASAP-2020 automatic

N<sub>2</sub> adsorption system (America). The loading of Na and Zr was measured by inductively coupled plasma-atomic emission spectrometry (ICP-AES) on an IRIS Intrepid II XSP instrument. X-ray photoelectron spectra (XPS) were carried out on a Thermo Scientific ESCALAB 250Xi X-ray photoelectron spectrometer with a monochromatic Al K $\alpha$  source ( $h\nu = 1486.6$  eV) with an operating power of 150 W (15 kV, 10 mA). Scanning electron microscope (SEM) studies were performed on an S-4800 instrument (Japan). Transmission electron microscopy (TEM) images, high-angle annular dark-field scanning TEM (HAADF-STEM), and energy-dispersive X-ray (EDX) mapping were recorded on a Tecnai G2 F30 S-TWIN electron microscope.

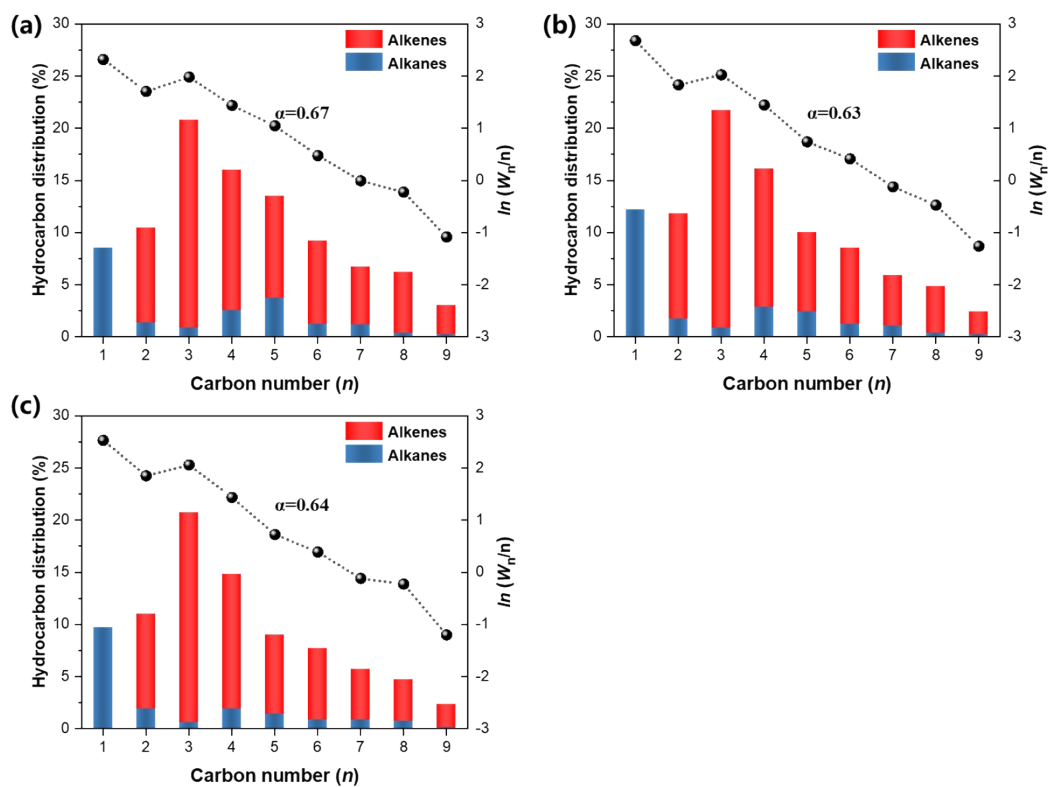

**Figure S1.** The detailed alkane and olefin distribution, the ASF plot and the corresponding  $\alpha$  value ( $\alpha$  represents the probability of chain growth) of (a) NaFe; (b) NaZnFe; (c) NaCuFe.

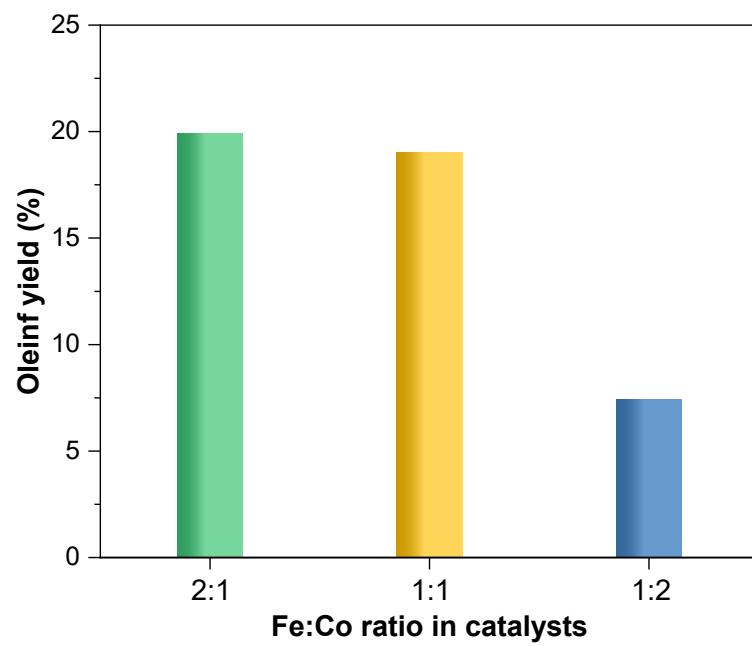

**Figure S2.** olefin yield over NaCoFe catalysts with different Fe:Co molar ratio.

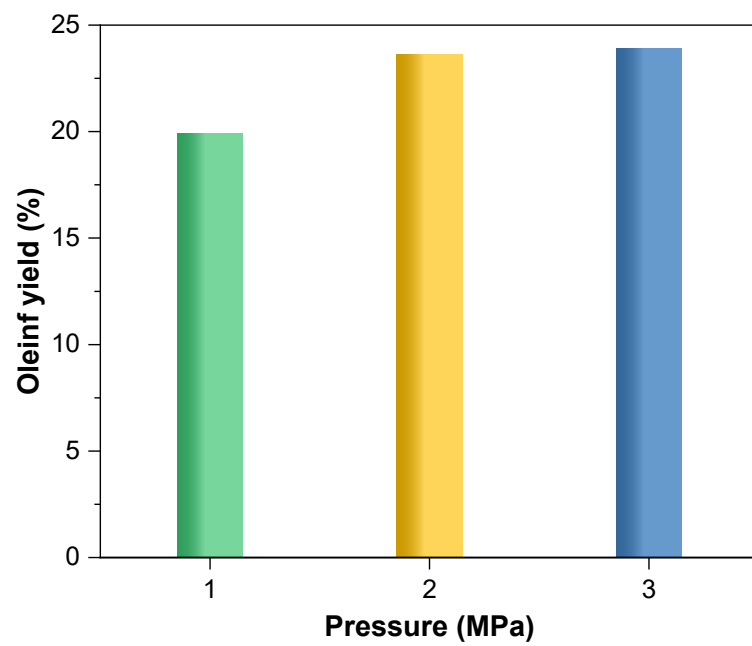

**Figure S3.** The effect of reaction pressure on the olefin yield.

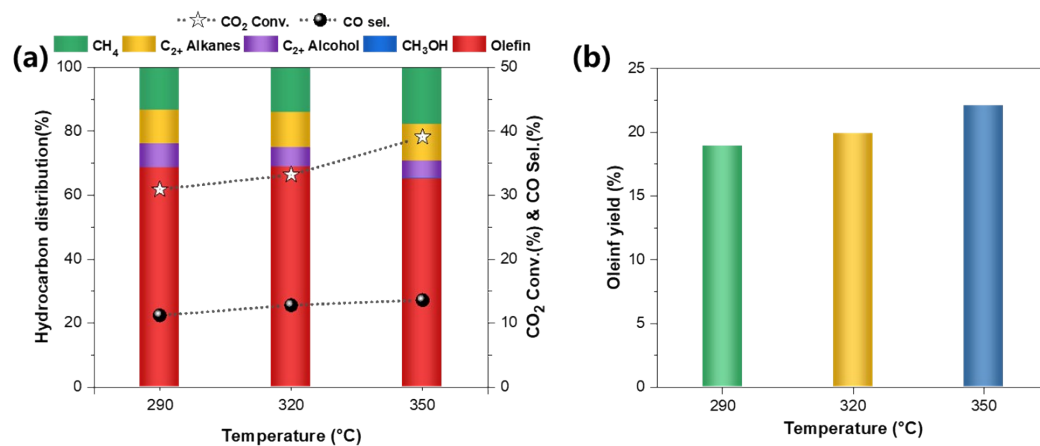

**Figure S4.** The effect of reaction temperature on the catalytic performance toward CO<sub>2</sub> hydrogenation. (a) The product distribution, CO<sub>2</sub> conversion, CO selectivity, and (b) olefin yield.



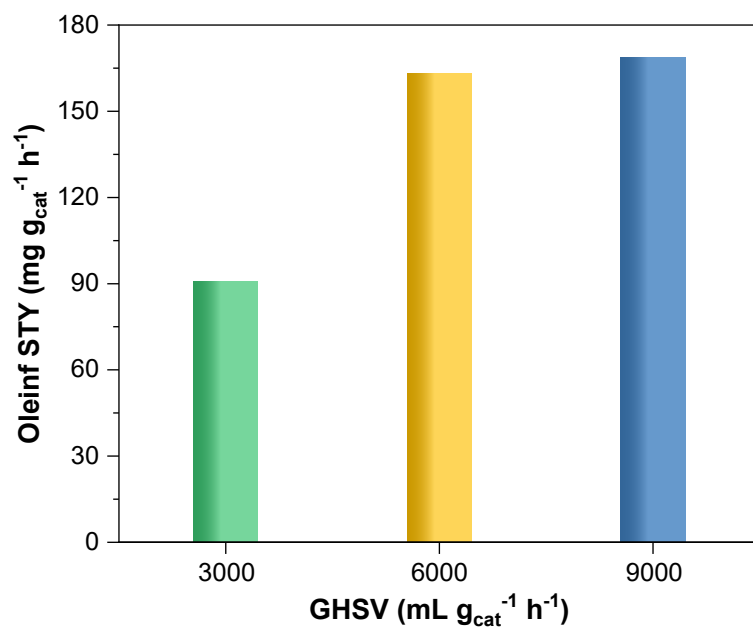

**Figure S5.** The effect of gas hourly space velocity (GHSV) on the STY of olefin.

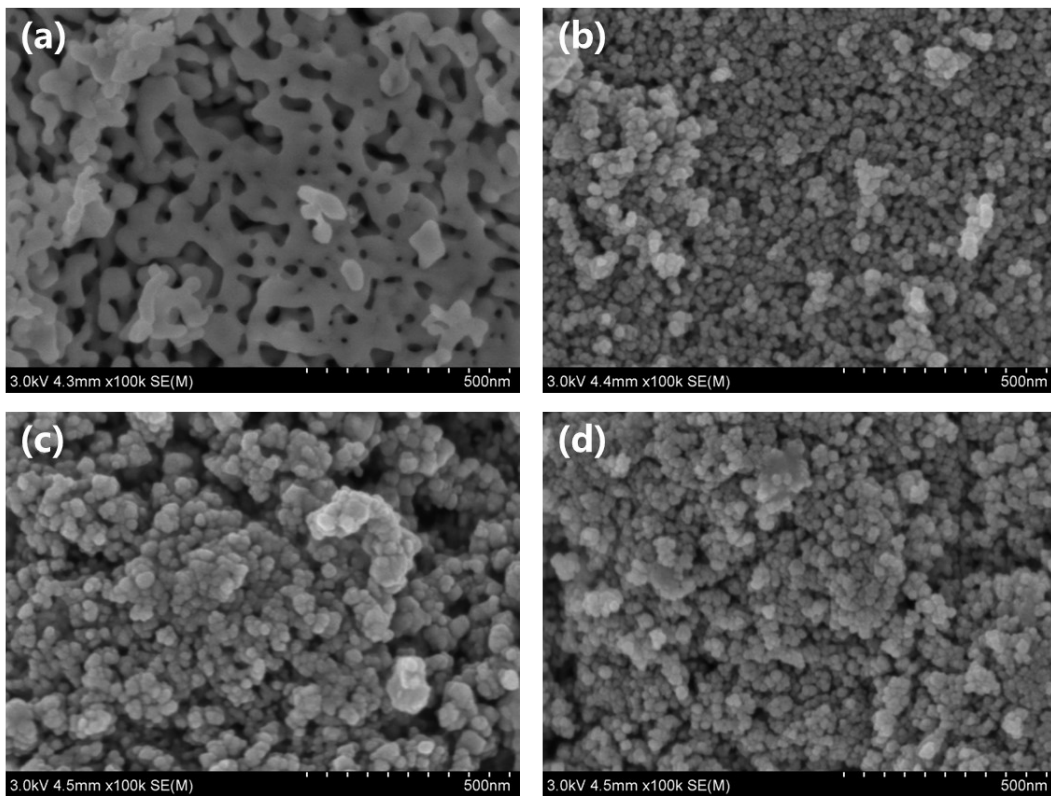

**Figure S6.** SEM images of fresh catalyst: (a) NaFe; (b) NaZnFe; (c) NaCuFe; (d) NaCoFe

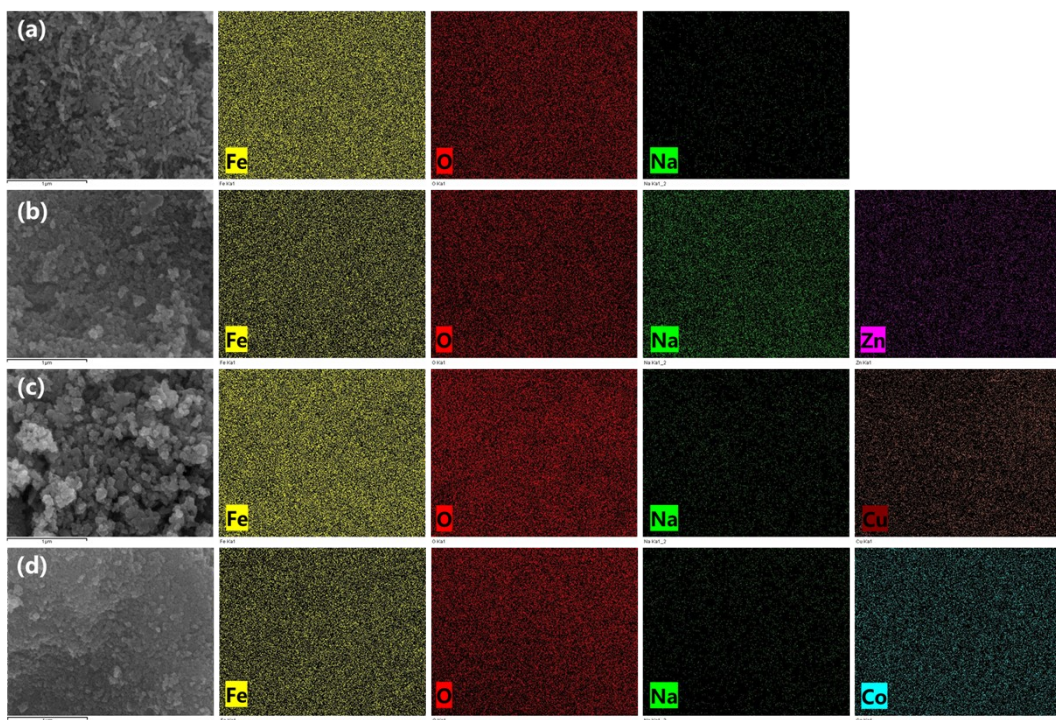

**Figure S7.** SEM images and elemental mapping images of (a) NaFe; (b) NaZnFe; (c) NaCuFe; (d) NaCoFe

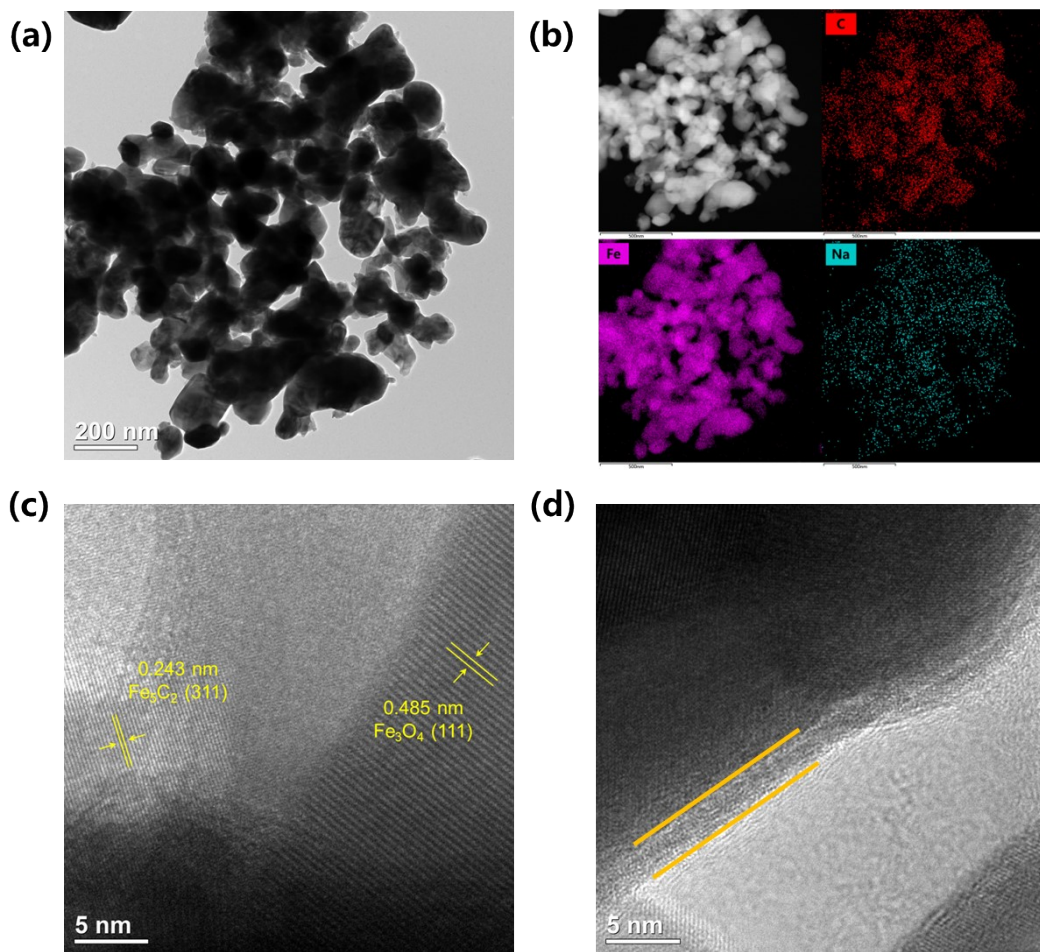

**Figure S8.** (a) TEM images; (b) STEM images with corresponding elemental mapping of Co, Fe, Na and (c, d) HRTEM images of the spent NaFe sample.

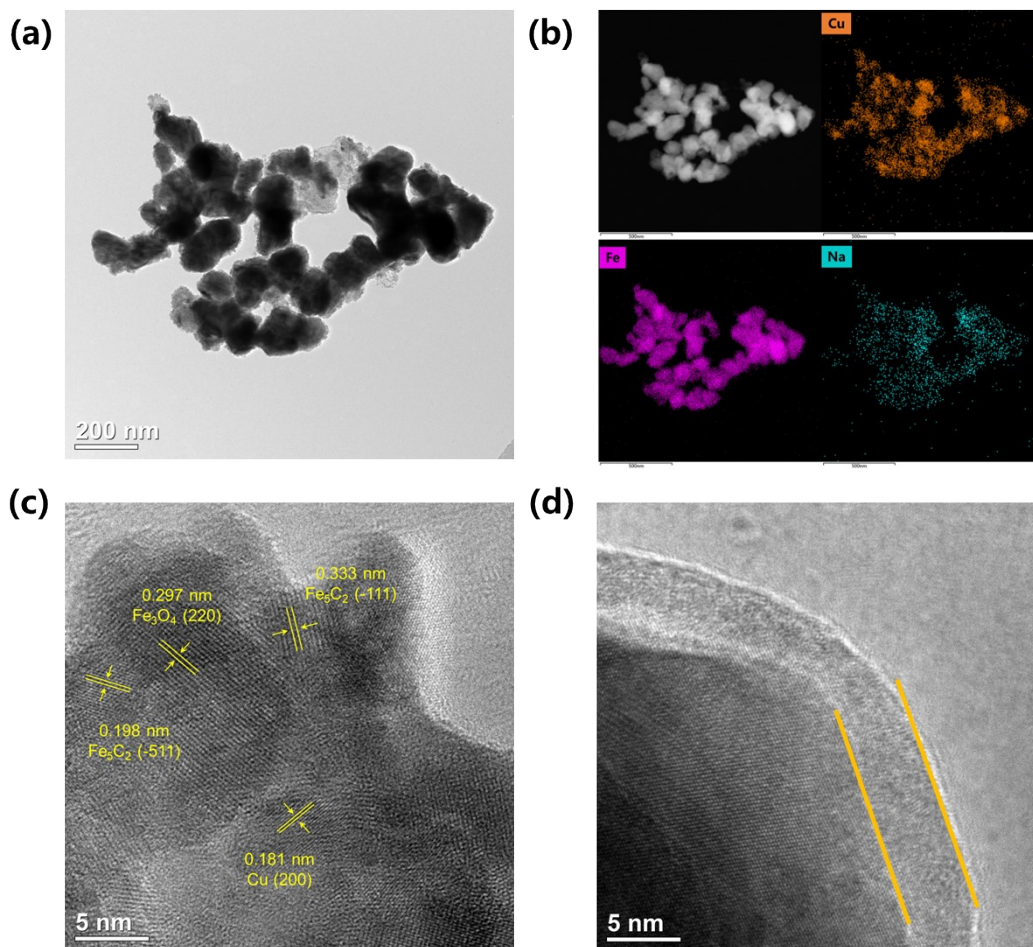

**Figure S9.** (a) TEM images; (b) STEM images with corresponding elemental mapping of Co, Fe, Na and (c, d) HRTEM images of the spent NaCuFe sample.

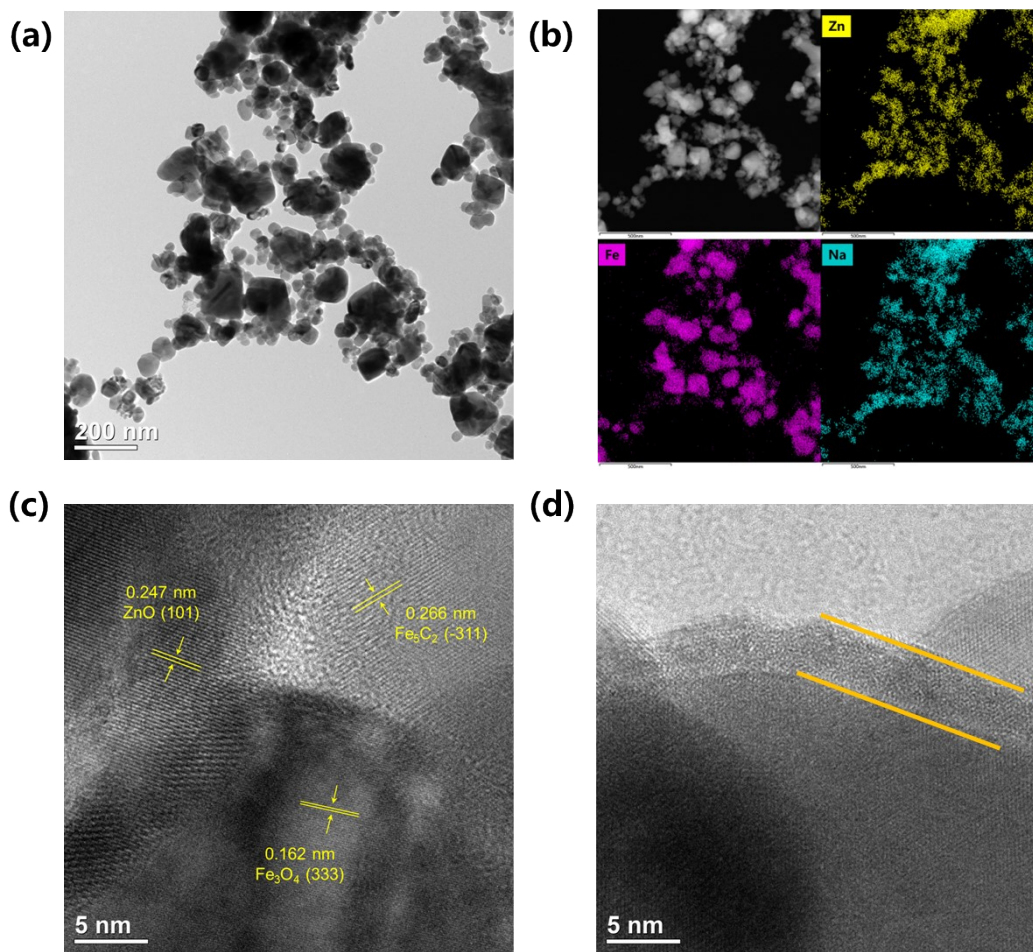

**Figure S10.** (a) TEM images; (b) STEM images with corresponding elemental mapping of Co, Fe, Na and (c, d) HRTEM images of the spent NaZnFe sample.

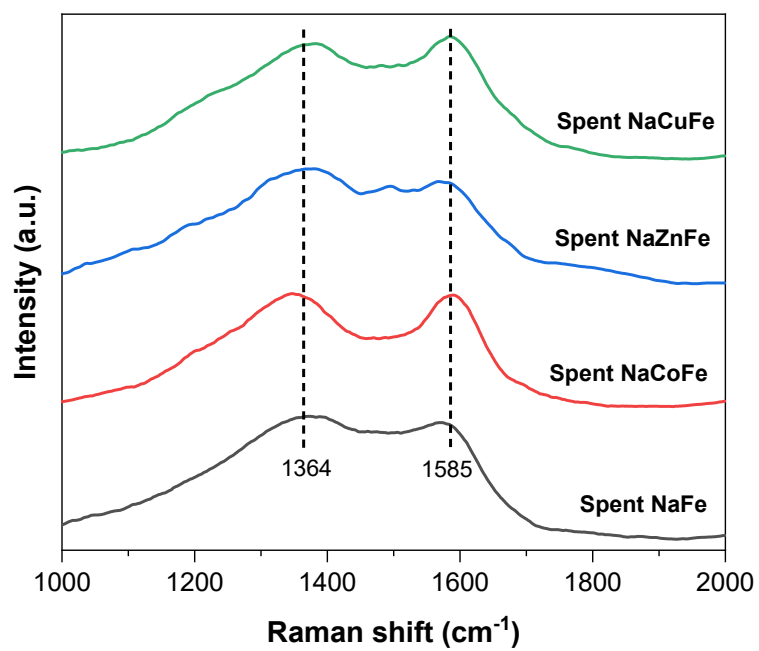

**Figure S11.** Raman spectra of the spent catalysts.

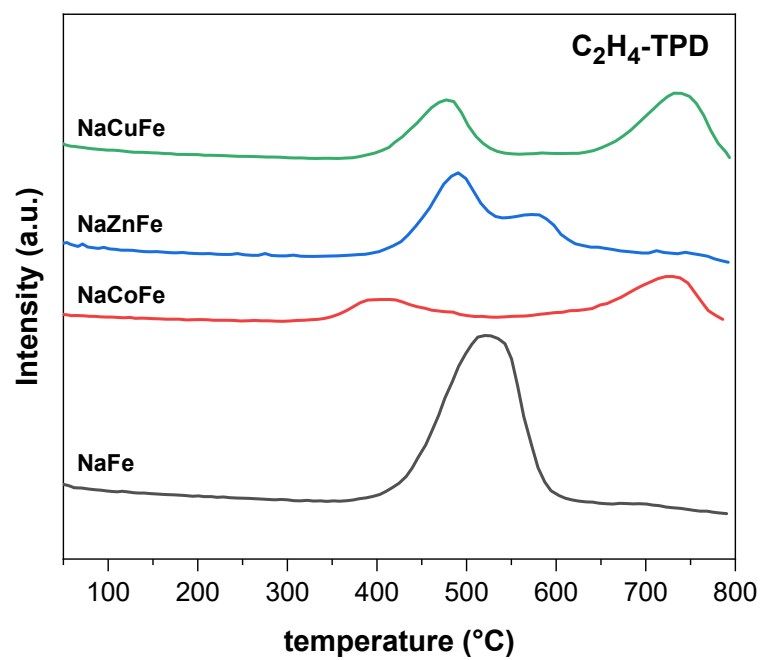

Figure S12. C<sub>2</sub>H<sub>4</sub>-TPD profiles of the Fe-based catalysts.



**Table S1.** Catalytic performance of Fe-based catalysts in CO<sub>2</sub> hydrogenation

| Catalysts | CO <sub>2</sub> Conv. (%) | CO Sel.(%) | CO-free Selectivity (%) |                            |                             |        | Olefin yield(%) |
|-----------|---------------------------|------------|-------------------------|----------------------------|-----------------------------|--------|-----------------|
|           |                           |            | CH <sub>4</sub>         | C <sub>2+</sub><br>alkanes | C <sub>2+</sub><br>Alcohols | Olefin |                 |
| NaFe      | 27.7                      | 16.8       | 8.5                     | 11                         | 5.7                         | 74.8   | 17.2            |
| NaZnFe    | 27.3                      | 18.6       | 12.2                    | 10.4                       | 6.4                         | 71     | 15.8            |
| NaCuFe    | 27.8                      | 18.4       | 9.7                     | 8.3                        | 13.4                        | 68.4   | 14.6            |
| NaCoFe    | 33.2                      | 12.8       | 14.0                    | 11.1                       | 6.1                         | 68.8   | 19.9            |
